# Supplementary material for: Electoral systems and trade-policy outcomes: the effects of personal-vote incentives on barriers to international trade
Source: Springer Nature journal article supplement (doi:10.1007/s11127-019-00640-4), 2019-01-18
Supplement: MOESM1 [file 16406866]

Appendix

Electoral Systems and Trade-Policy Outcomes: The Effects of Personal-Vote Incentives on Barriers to International Trade

**For Online Publication Only.**

## Country-Specific Electoral-Institution Sources

Bawn, Kathleen and Thies, Michael 2003. “A comparative theory of electoral incentives: Representing the unorganized under PR, plurality, and mixed-member electoral systems.” *Journal of Theoretical Politics* vol. 15: 5-32.

Carter Center 2004. “East Timor Political and Election Observation Project.” Carter Center Special Report Series. Available at: https://www.cartercenter.org/documents/1691.pdf

CSCE 1994. “The Parliamentary Elections in Kazakhstan: March 7, 1994.” Report Prepared for the Commission on Security and Cooperation in Europe, available at: https://www.oscepa.org/documents/all-documents/election-observation/election-observation-statements/kazakhstan/statements-13/1422-1994-parliamentary-1/file

CSCE 1995. “The Parliamentary Elections in Kyrgyzstan: February 5, 1995.” Report Prepared for the Commission on Security and Cooperation in Europe, available at: https://babel.hathitrust.org/cgi/pt?id=mdp.39015034522881

Commonwealth Secretariat 2010. “Tanzania General Elections: 31 October 2010.” Report for the Commonwealth Observer Group, available at: http://www.keepeek.com/Digital-Asset-Management/oecd/commonwealth/governance/tanzania-general-elections-31-october-2010_9781849290494-en#.V77B8a2gh_k

European Commission for Democracy Through Law (Venice Commission) 2015. “Proportional Electoral Systems: The Allocation of Seats Inside the Lists (Open/Closed Lists).” Report distributed at Venice Commission meeting 23 March 2015. Available at: http://www.venice.coe.int/webforms/documents/default.aspx?pdffile=CDL-AD(2015)001-e

Ginsburg, Tom 1997. “Fighting Fire and Ice: Mongolia.” *Asian Survey* vol: 37, no. 1: 60-64

Hardman, Helen Undated. “Electoral System Change in Europe since 1945: Slovenia” Paper produced for ESCE: Electoral System Change in Europe since 1945, available at: http://www.electoralsystemchanges.eu/Files/media/MEDIA_171/FILE/Slovenia_summary.pdf

IFES 2009. “Proportional Representation Open List Electoral Systems in Europe.” Election Issues Paper 1, available at: http://www.ifes.org/publications/proportional-representation-open-list-electoral-systems-europe

Kandeh, Jimmy D. 1998. “Transition without Rupture: Sierra Leone’s Transfer Election of 1996.” *African Studies Review* vol. 41, no. 2: 91-111

Landman, Todd 2005. “State of Democracy in Mongolia: A Desk Study.” Report, available at: http://www.idea.int/democracy/upload/sodMongolia05.pdf

Malazogu, Leon and Dugolli, Ilir 2005. *Reforming the Electoral System of Kosova*. Prishtina: Kosovar Institute for Policy Research and Development, available at: http://www.kipred.org/repository/docs/REFORMING_THE_ELECTORAL_SYSTEM_OF_KOSOVA_840210.pdf

Marston, Hunter 2013. “Myanmar's Electoral System: Reviewing the 2010 and 2012 Elections and Looking Ahead to the 2015 General Elections.” *Asian Journal of Political Science* vol. 21, no. 3: 268-284

McLaughlin, Andrea and Webb, Anthea 1998. “PNG Drought: After the Rains.” AusAid: 7-10. Available at: http://www.ausaid.gov.au/publications/focus/0398/03987-11.pdf

Molina, Jose E. and Perez Carmen 1998. “Evolution of the Party System in Venezuela, 1946-1993.” *Journal of Interamerican Studies and World Affairs* vol. 40, no. 2: 1-26

NDI 1993. *Coordinating observers to the 1993 elections in Niger*. Washington DC: Library of Congress Cataloging-in-Publication Data.

Qirezi, Arben 2014. “Political effects of electoral systems: Simulation with the case of Kosovo.” CPC Paper Series: Paper #1, Prishtina 2014

Teehankee, Julio 2002. “Electoral Politics in the Philippines,” in Bruns, Gabriele, Aurel Croissant, and Marei John (eds.) *Electoral Politics in Southeast and East Asia*, Singapore: Friedrich Ebert Stiftung

Trade Information Database undated. “Trinidad and Tobago.” [Online] Available at: http://ctrc.sice.oas.org/trc/TrinidadTobago/TrinidadTobagoTP.asp

UK Department for International Trade 2016. “Guidance: Overseas Business Risk: Suriname.” [Online] Available at: https://www.gov.uk/government/publications/overseas-business-risk-suriname/overseas-business-risk-suriname

Weber, Renate 2009. “General Elections in Ecuador: Election Observation Delegation.” European Parliament Report. Available at: http://www.europarl.europa.eu/intcoop/election_observation/missions/2004-2009/20090426_ecuador.pdf

World Bank 1999. “Memorandum of the President of the International Bank for Reconstruction and Development to the Executive Directors on a Country Assistance Strategy of the World Bank Group for the Republic of Trinidad and Tobago.” [Online] Available at: http://ctrc.sice.oas.org/TRC/Articles/trinidad/WB_country_strategy.pdf

WTO 1996. “Dominican Republic: February 1996.” [Online] Available at: https://www.wto.org/english/tratop_e/tpr_e/tp25_e.htm

WTO 1998. “Trinidad and Tobago: November 1998.” [Online] Available at: https://www.wto.org/english/tratop_e/tpr_e/tp87_e.htm

**Variable Data Sources**

| **Variable** | **Variable Name** | **Data Source** |
| --- | --- | --- |
| Personal-Vote Incentive Index |  | See text |
| Logged GDP Per Capita (PPP) |  | World Development Indicators (WDI) |
| Logged Land Mass |  | WDI |
| Logged Unemployment |  | WDI |
| Logged World GDP |  | IMF |
| Legal Origins |  | La Porta et al. (1997) |
| EU |  |  |
| Average Tariff | AT | WDI |
| Overall Trade Restrictiveness Index | OTRI | Kee et al. (2009) |
| Trade Freedom Index | TFI | Heritage Foundation |
| Legal/colonial/constitution IVs |  | Persson and Tabellini (2003) |

## District Magnitude

We initially intended to include national-average district magnitude as a regressor in keeping with common practice. After preliminary regressions its effects were shown to be very near zero in all cases and its effects on other variables were similarly near non-existent. Our electoral-system index proxies that effect as well as national-average magnitude might, by giving a higher or lower value to systems that would otherwise have scored similarly on Carey and Shugart’s original ranking based on whether they use multimember or single member districts. In the original publication, where there is an incentive to cultivate a personal vote (that is, in any electoral system other than CLPR), an increase in district magnitude should lead to an increase in the relative weight of personal reputation against party reputation and thus an increase in incentive to pursue the cultivation of a personal vote. Here, that would translate to more protectionist rather than open trade policies. Although this cannot perfectly model the effect of magnitude theorized originally, which is thought to be determined by the ratio of candidates put forth in each election in each district or a derivative strategy (see Crisp et al., 2007), it will be able to provide a rough approximation of the effects and will be suitable here. Additionally, the original argument behind the effect of M on intraparty competition and personal-vote incentives was on a per district basis, not a national average, meaning that including the average M per nation would be an attempt to include the effect of that particular value of M. This would be less reflective of its effects in a nation than in a district with a value of M the same as the national average value. Explicitly modelling the actual effect of M would require a cross-national, district level study which is beyond constraints imposed by time and space here.

**Table A1 – Electoral System with Magnitude**

|  | | |
| --- | --- | --- |
|  | **AvTariff** | **TFI** |
| Electoral System | 0.048*** | -0.068*** |
|  | (0.010) | (0.020) |
| District Magnitude | 0.000 | 0.001 |
|  | (0.001) | (0.001) |
| R2 | 0.135 | 0.043 |
| Adj. R2 | 0.133 | 0.040 |
| Num. obs. | 993 | 638 |
| ***p < 0.001, **p < 0.01, *p < 0.05 | | |

### VIF Multicollinearity Test

Table A2 – VIF Results

| **VIF Multicollinearity Test** | |
| --- | --- |
| Variable | Score |
| Electoral Systems | 1.624 |
| L. GDP pc within | 2.106 |
| L. GDP pc between | 1.493 |
| L. Land Area | 1.717 |
| L. Pop. Density within | 1.709 |
| L. Pop. Density between | 1.949 |
| Unemployment within | 1.061 |
| Unemployment between | 1.171 |
| EU Member | 1.427 |
| UK Legal Origin | 5.023 |
| French Legal Origin | 5.684 |
| Socialist Leg. Origin | 4.151 |
| German Leg. Origin | 2.198 |
| L. World GDP | 1.034 |

## Cases of Electoral Reform

Perhaps one of the most famous modern cases of electoral reform is that of New Zealand which transitioned from a first-past-the-post system that was described as “more Westminster than Westminster” to a mixed member proportional system that closely resembles Germany’s. In the following table, in the year before the reform, the average tariff rate was 11.07. Following the passage of the reform the average tariff rate declined by more than half over two years and remained well below this level in all but one year (following the GFC) settling at a point below 3.0.

Similar trends can be observed in other countries which instituted electoral reforms during the period we study. Ukraine passed two reforms in this period, first from single-member plurality with party endorsement to mixed-member majoritarian and then afterward dropping from a score of 10 to 0 on our personal vote incentive index, instituting closed-list PR. As such, we would expect to see a decrease in average tariff and increase in trade freedom score from the beginning of the period to the end. Given the short period in which Ukraine had a MMM electoral system (only 2 years), it is less likely that we would observe an effect on trade policy. And indeed we do find a general trend in which the average tariff generally decreases from a high of 3.93 to a low of 1.91 and the TF score increases from a low of 55 to a high of 85.2. In Madagascar, we observe an *increase* in average tariff rate following reform from a CLPR system to MMM. With this increase along the PV scale, we would expect to find an increase in the average tariff rate and decrease in the TF score. Here we do see an increase in the tariff rate following the reform though the effect on the TF score is less clear.

There are some cases in which we do not observe expected effect whereby an increase (decrease) in PV index score does not correspond with more protectionism (liberalization). In the case of Slovakia and Latvia we see small though opposite effects over the longer term and toward the end of the period our study covers as each country approaches EU membership. Additionally, in Mongolia despite movement down the scale from SMP without party endorsement to block vote (7 to 5) the average tariff actually increases slightly though with an increase in the trade freedom score from 77 to 81.2, followed by a small decrease to about 80.

New Zealand:

| Year | avtariff | revise | trade.freedom |
| --- | --- | --- | --- |
| 1992 | 11.07 | 7 | NA |
| 1993 | 9.14 | 2 | NA |
| 1996 | 5.02 | 2 | 78.6 |
| 1997 | 5.67 | 2 | 78.6a |
| 1998 | 3.79 | 2 | 78.6 |
| 1999 | 3.17 | 2 | 77.4 |
| 2000 | 2.46 | 2 | 78.6 |
| 2002 | 4.67 | 2 | 78.4 |
| 2003 | 4.83 | 2 | 80.4 |
| 2004 | 5.61 | 2 | 80.2 |
| 2005 | 4.24 | 2 | 79.4 |
| 2006 | 9.7 | 2 | 79.2 |
| 2007 | 2.72 | 2 | 84 |
| 2008 | 2.07 | 2 | 80.8 |
| 2009 | 1.74 | 2 | 84.6 |
| 2010 | 1.62 | 2 | 86 |

Ukraine:

| Year | avtariff | revise | trade.freedom |
| --- | --- | --- | --- |
| 1995 | 3.36 | 9 | 55 |
| 1997 | 3.93 | 9 | 66 |
| 2002 | 3.87 | 10 | 71 |
| 2006 | 3.07 | 10 | 77.2 |
| 2008 | 3.85 | 0 | 82.2 |
| 2009 | 2.37 | 0 | 84 |
| 2010 | 2.78 | 0 | 82.6 |
| 2011 | 1.91 | 0 | 85.2 |
| 2012 | 2.06 | 0 | 84.4 |

Madagascar:

| Year | avtariff | revise | trade.freedom |
| --- | --- | --- | --- |
| 1995 | 5.18 | 0 | NA |
| 2001 | 3.43 | 10 | NA |
| 2005 | 5.89 | 10 | 79.2 |
| 2006 | 9.54 | 10 | 77.8 |
| 2007 | 8.35 | 10 | 82.8 |
| 2008 | 8.26 | 10 | 79.6 |

Mongolia:

| Year | avtariff | revise | trade.freedom |
| --- | --- | --- | --- |
| 2005 | 4.29 | 7 | 77 |
| 2006 | 4.4 | 7 | 77 |
| 2007 | 5.1 | 7 | 80 |
| 2008 | 5.1 | 5 | 81.4 |
| 2009 | 5.1 | 5 | 81.2 |
| 2011 | 5.13 | 5 | 79.8 |

Slovakia:

| Year | avtariff | revise | trade.freedom |
| --- | --- | --- | --- |
| 1994 | 4.44 | 1 | NA |
| 1995 | 6.27 | 1 | 75 |
| 1996 | 4.01 | 1 | 75 |
| 1997 | 3.62 | 1 | 73 |
| 1998 | 3.29 | 1 | 73 |
| 1999 | 3.13 | 1 | 73 |
| 2000 | 2.14 | 0 | 71.2 |
| 2001 | 3.02 | 0 | 80.2 |
| 2002 | 1.99 | 0 | 79.8 |
| 2003 | 2.03 | 0 | 72.8 |

Latvia:

| Year | avtariff | revise |
| --- | --- | --- |
| 1994 | 4.44 | 0 |
| 1995 | 6.27 | 1 |
| 1996 | 4.01 | 1 |
| 1997 | 3.62 | 1 |
| 1998 | 3.29 | 1 |
| 1999 | 3.13 | 1 |
| 2000 | 2.14 | 1 |
| 2001 | 3.02 | 1 |
| 2002 | 1.99 | 1 |
| 2003 | 2.03 | 1 |

## Personal-Vote Incentives and Trade Protection Over Time

Graphs illustrating variation between countries (bar) and average variation over time (line) for each outcome variable and broken down into groups of high and low PV scores.

High PV scores:


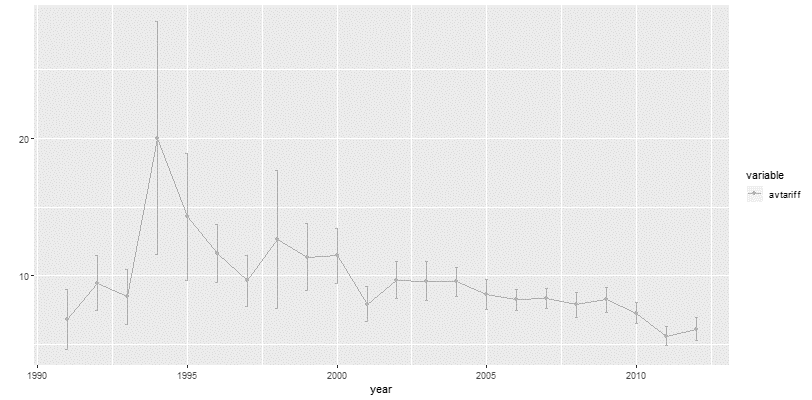

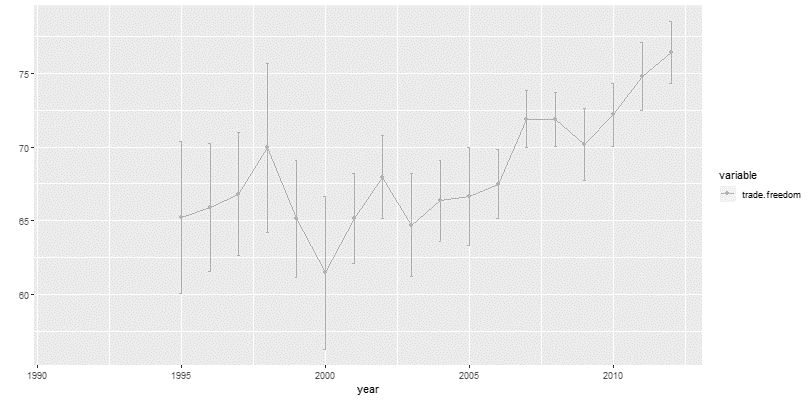

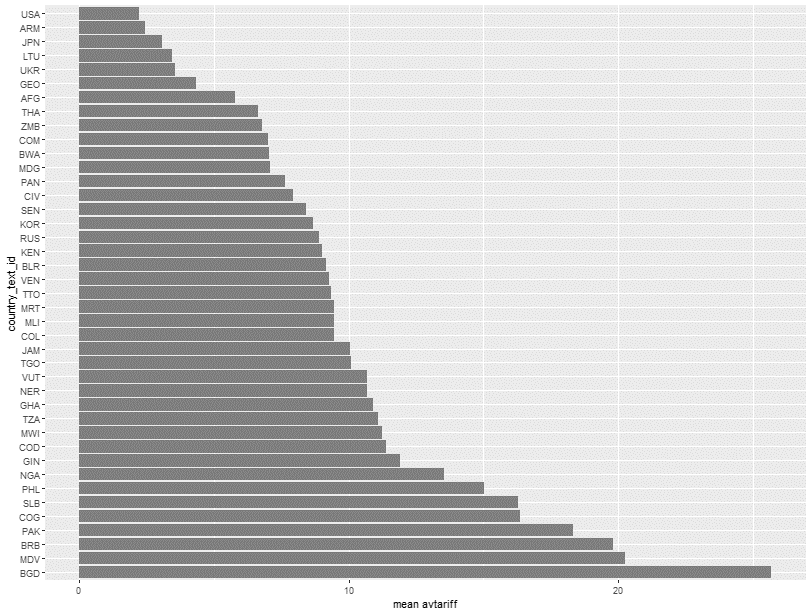

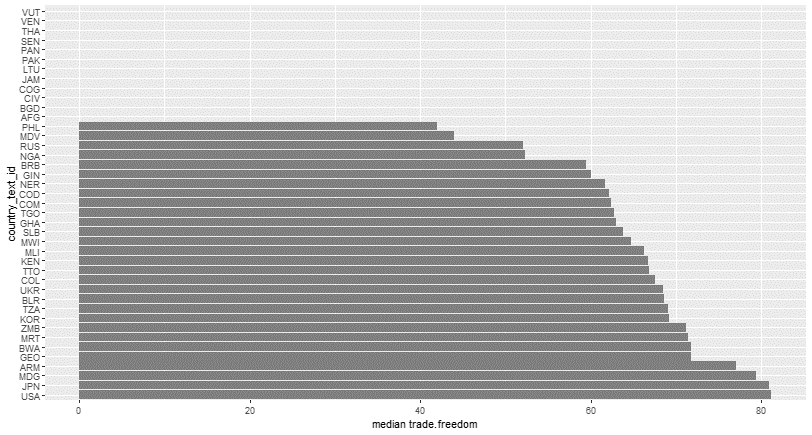


Low Scores:


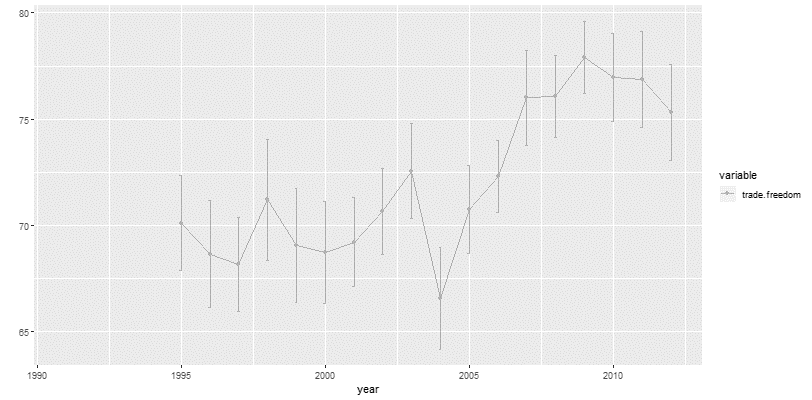

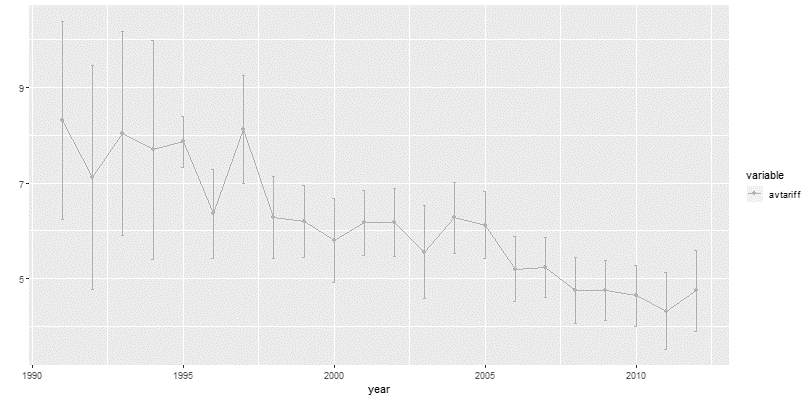

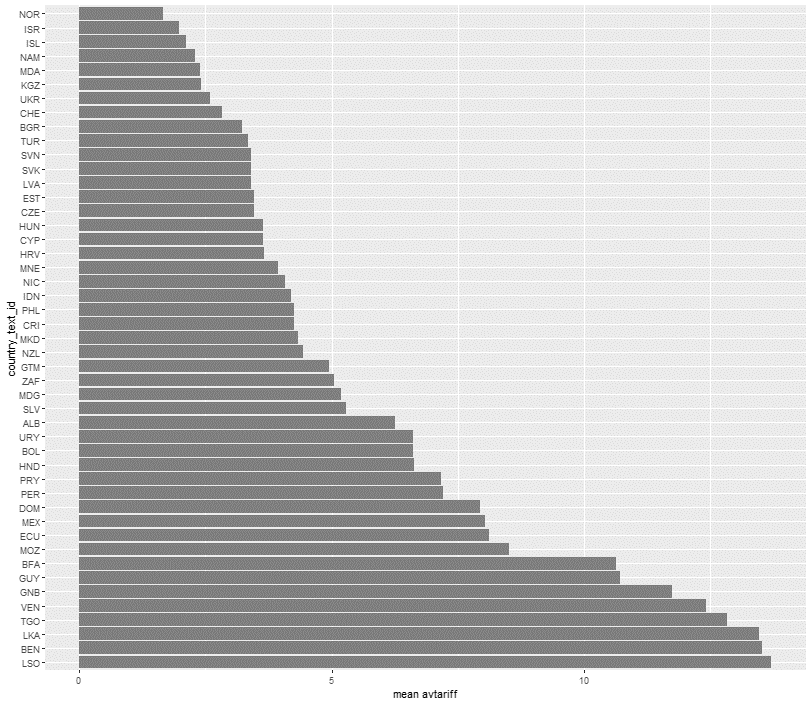

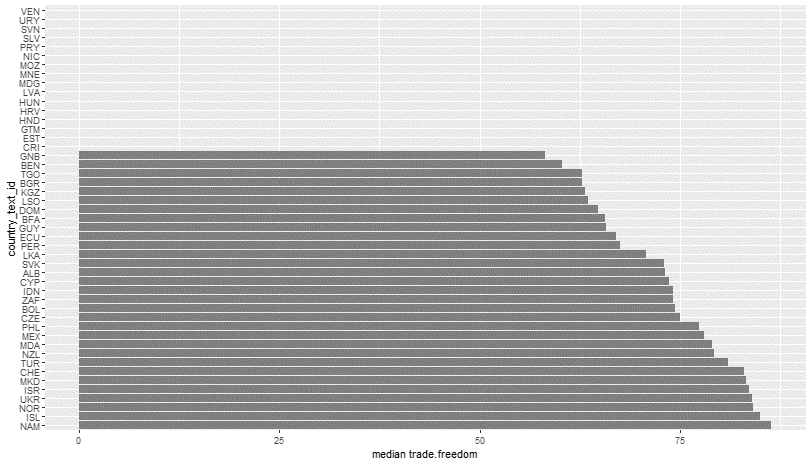


### TFI Outliers

When assessing the distribution of TFI measures, we observed some potentially significant outliers. Each of these observations is more than three standard deviations away from the mean TFI score. Outliers can exert influence on outcomes and potentially drive results, so further investigation was warranted. The outlying TFI observations come from India, Suriname, Nigeria, Tanzania, Trinidad and Tobago (TT), and Papua New Guinea (PNG) between the years 1995 and 2000. All told, these outliers constitute less than 1% of the total sample observations. We begin by investigating the outliers to check against potential measurement or data-entry error. Each of the outliers comes from a developing nation in years during or immediately surrounding events which could arguably constitute extenuating circumstances. India had been a closed economy prior to the 1980s with tariffs often exceeding 200% and had only begun economic and political reforms in the 1990s (the time-period where the outliers occur and the sample begins). Nigeria and Suriname are both notoriously corrupt countries where the former’s political system has been criticized as “opaque and arbitrary” and the latter’s described as rife with corruption and drugs money at all levels. (UK DFIT 2016 and Fasan 2015) PNG had experienced a drought and frost during and prior to 1997 which led to the collapse of numerous sectors and death throughout the country. (McLaughlin and Webb 1998) TT, similar to India, was undergoing political and economic reforms during its first year of inclusion in the dataset: 1996 (the year where TT is an outlier). (World Bank, 1999) Rerunning the TFI REWB model without the outliers slightly improves the link between our electoral-system index and model fit, but the substantive effect is essentially the same as when the outlying observations are included in the analysis.

**Multiple Imputation**

Initially, missing values were addressed by default via listwise deletion in R. In order to ensure that results obtained were not the product of biases introduced by systematically missing information we decided to fill in missing observations and rerun the relevant regressions. There are a number of methods used in political economy and other social science research to fill in or address missing observations (“missingness”), each with their own issues. Aggregating covariates into averages over, say, 5 or 10 year periods, while a common strategy, “can reduce the number of observations on the dependent variable by 80 or 90% [and] limits the complexity of possible functional forms estimated and number of control variables included, due to the restricted degrees of freedom… greatly affect[ing] empirical results – a point regularly discussed and lamented in numerous articles.” (Honaker & King 2010: 562) Beyond averaging, other, ad hoc approaches have been developed: linear interpolation, imputation with means, and researchers’ “best guess.” These alternatives have been found to produce biased and inefficient inferences, standard errors, confidence intervals, and are “almost uniformly dominated by appropriate multiple imputation-based approaches.” (Little and Rubin, 2002)

Multiple imputation creates many datasets with imputed values plugged into missing observations and then takes a mean for each imputed value across the multiple sets. Uncertainty in the predictive model is represented by the variation across the multiple imputations for each missing value which is included in the standard errors of the ultimate quantity of interest. Honaker & King (2010) shows that the bootstrapping method utilized by Gary King’s Amelia II package for R produces reliable and efficient estimates for missing observations in social science data. It is this package with which multiple imputation was carried out. Results are reported below for the average tariff uni- and multivariate regression run with the imputed dataset with m=5 imputations. The imputed-data regression results for average tariff show a slight in-absolute-terms increase in the estimated effect of personal vote cultivation in electoral systems and average tariff levels and an increase in statistical significance to a p-value of 0.001.

Although we ran multiple imputation on the Trade Freedom Index variable in Amelia II, as well, the proportion of missing observations was simply too high for the estimates to be dependable. For this reason, results are not included here, although regressions showed no change to the significance of the results despite a slightly diminished coefficient.

Table A3 – REWB Analyses with Imputed Data (AT DV)

|  | | | |
| --- | --- | --- | --- |
|  | **A1** | **A2** | **A3** |
| Electoral System | 0.046*** | 0.030*** | 0.028*** |
|  | (0.009) | (0.007) | (0.007) |
| L.GDP pc Within |  | -1.026*** | -1.041*** |
|  |  | (0.057) | (0.056) |
| L.GDP pc Between |  | -0.292*** | -0.246*** |
|  |  | (0.034) | (0.038) |
| L.Land Area |  | -0.019 | -0.029 |
|  |  | (0.023) | (0.022) |
| L.Pop.Den Within |  | -0.356* | -0.336* |
|  |  | (0.170) | (0.167) |
| L.Pop.Den Between |  | 0.019 | 0.016 |
|  |  | (0.032) | (0.033) |
| Unemployment Within |  | -0.017** | -0.017** |
|  |  | (0.006) | (0.006) |
| Unemployment Between |  | -0.002 | 0.002 |
|  |  | (0.006) | (0.006) |
| UK Legal Origin |  | 0.005 | -0.003 |
|  |  | (0.006) | (0.006) |
| FR Leg. Origin |  |  | 0.469* |
|  |  |  | (0.196) |
| Socialist Leg. Origin |  |  | 0.411* |
|  |  |  | (0.199) |
| DL Leg. Origin |  |  | -0.099 |
|  |  |  | (0.200) |
| L. World GDP |  |  | 0.130 |
|  |  |  | (0.250) |
| AVTariff Diffusion |  |  | -0.003 |
|  |  |  | (0.007) |
| R2 | 0.134 | 0.524 | 0.543 |
| Adj. R2 | 0.133 | 0.519 | 0.536 |
| Num. obs. | 993 | 971 | 971 |
| ***p < 0.001, **p < 0.01, *p < 0.05 | | | |

**Table A4 – REWB Analyses with Polity Sample**

|  | | | | |
| --- | --- | --- | --- | --- |
|  | **A4** | **A5** | **A6** | **A7** |
|  | **AT** | **AT** | **TFI** | **TFI** |
| Electoral System | 0.038** | 0.035** | -0.050* | -0.040* |
|  | (0.014) | (0.011) | (0.023) | (0.017) |
| L. GDP pc Within |  | -1.420*** |  | 2.166*** |
|  |  | (0.238) |  | (0.339) |
| L. GDP pc Between |  | -0.184*** |  | 0.221** |
|  |  | (0.048) |  | (0.071) |
| L. Land Area |  | 0.170** |  | -0.233** |
|  |  | (0.053) |  | (0.083) |
| L. Pop.Den Within |  | 0.053 |  | 0.089 |
|  |  | (0.478) |  | (0.825) |
| L. PopDen Between |  | 0.166** |  | -0.310*** |
|  |  | (0.063) |  | (0.093) |
| Unemployment Within |  | -0.019* |  | 0.024 |
|  |  | (0.008) |  | (0.015) |
| Unemployment Between |  | 0.004 |  | 0.000 |
|  |  | (0.007) |  | (0.010) |
| UK Legal Origin |  | 0.305* |  | 0.091 |
|  |  | (0.120) |  | (0.136) |
| French Legal Origin |  | 0.222 |  | 0.214 |
|  |  | (0.121) |  | (0.182) |
| Socialist Legal Origin |  | -0.217 |  | 0.275 |
|  |  | (0.139) |  | (0.239) |
| DL Legal Origin |  | 0.265 |  | 0.374* |
|  |  | (0.148) |  | (0.187) |
| AvTariff Diffusion |  | 0.335 |  |  |
|  |  | (0.177) |  |  |
| World GDP |  | -0.001 |  | -0.018 |
|  |  | (0.006) |  | (0.011) |
| TFI Diffusion |  |  |  | 0.410* |
|  |  |  |  | (0.193) |
| R2 | 0.094 | 0.506 | 0.008 | 0.434 |
| Adj. R2 | 0.093 | 0.497 | 0.007 | 0.426 |
| Num. obs. | 878 | 803 | 1063 | 1012 |
| ***p < 0.001, **p < 0.01, *p < 0.05 |  |  |  |  |
|  |  |  |  |  |
|  | | | | |

**Table A5 – REWB Models with Converted 3-Point Scale**

|  | | | | | | |
| --- | --- | --- | --- | --- | --- | --- |
|  | **A8** | **A9** | **A10** | **A11** | **A12** | **A13** |
|  | **AT** | **AT** | **AT** | **TFI** | **TFI** | **TFI** |
| Electoral System | 0.211** | 0.135* | 0.123* | -0.367** | -0.193* | -0.191* |
|  | (0.072) | (0.054) | (0.054) | (0.111) | (0.078) | (0.086) |
| L.GDP pc Within |  | -1.015*** | -1.031*** |  | 1.318*** | 1.282*** |
|  |  | (0.139) | (0.138) |  | (0.212) | (0.210) |
| L.GDP pc Between |  | -0.285*** | -0.242*** |  | 0.289*** | 0.284*** |
|  |  | (0.041) | (0.049) |  | (0.061) | (0.072) |
| L.Land Area |  | -0.016 | -0.025 |  | 0.012 | 0.002 |
|  |  | (0.032) | (0.030) |  | (0.050) | (0.055) |
| L.Pop.Den Within |  | -0.371 | -0.351 |  | 1.209* | 1.192* |
|  |  | (0.313) | (0.311) |  | (0.588) | (0.584) |
| L.Pop.Den Between |  | 0.021 | 0.019 |  | -0.074 | -0.113 |
|  |  | (0.039) | (0.043) |  | (0.062) | (0.073) |
| Unemployment Within |  | -0.017* | -0.017* |  | 0.007 | 0.003 |
|  |  | (0.008) | (0.008) |  | (0.019) | (0.020) |
| Unemployment Between |  | -0.002 | 0.002 |  | -0.001 | 0.002 |
|  |  | (0.007) | (0.007) |  | (0.008) | (0.008) |
| AVTariff Diffusion |  | 0.006 | -0.002 |  |  |  |
|  |  | (0.008) | (0.007) |  |  |  |
| UK Legal Origin |  |  | 0.459** |  |  | -0.164 |
|  |  |  | (0.140) |  |  | (0.210) |
| FR Leg. Origin |  |  | 0.402** |  |  | 0.004 |
|  |  |  | (0.123) |  |  | (0.290) |
| Socialist Leg. Origin |  |  | -0.102 |  |  | 0.075 |
|  |  |  | (0.134) |  |  | (0.262) |
| DL Leg. Origin |  |  | 0.125 |  |  | 0.492 |
|  |  |  | (0.204) |  |  | (0.328) |
| L. World GDP |  |  | -0.004 |  |  | -0.033** |
|  |  |  | (0.005) |  |  | (0.011) |
| TFI Diffusion |  |  |  |  | 0.247 | 0.194 |
|  |  |  |  |  | (0.134) | (0.136) |
| R2 | 0.136 | 0.517 | 0.536 | 0.041 | 0.404 | 0.414 |
| Adj. R2 | 0.135 | 0.512 | 0.529 | 0.040 | 0.395 | 0.401 |
| Num. obs. | 993 | 971 | 971 | 638 | 638 | 638 |
| ***p < 0.001, **p < 0.01, *p < 0.05 | | | | | | |

Table A6 – REWB Models with AR(1) Corrected SEs

|  | **A14** | **A15** |
| --- | --- | --- |
|  | **AT** | **TFI** |
| Lag Elect. System | 0.029*** | -0.028* | |
|  | (0.005) | (0.009) | |
| L.GDP pc Within | -0.699*** | 1.182*** | |
|  | (0.089) | (0.195) | |
| L.GDP pc Between | -0.217*** | 0.247*** | |
|  | (0.024) | (0.048) | |
| L.Land Area | -0.034 | 0.009 | |
|  | (0.012) | (0.028) | |
| L.Pop.Den Within | -1.044*** | 1.149*** | |
|  | (0.251) | (0.444) | |
| L.Pop.Den Between | 0.004 | -0.083** | |
|  | (0.018) | (0.040) | |
| Unemployment Within | -0.007 | -0.006 | |
|  | (0.009) | (0.015) | |
| Unemployment Between | -0.001 | -0.002 | |
|  | (0.004) | (0.008) | |
| AVTariff Diffusion | 0.021*** |  | |
|  | (0.008) |  | |
| UK Legal Origin | 0.522*** | -0.212* | |
|  | (0.105) | (0.110) | |
| FR Leg. Origin | 0.451*** | -0.047 | |
|  | (0.106) | (0.154) | |
| Socialist Leg. Origin | 0.022 | 0.043 | |
|  | (0.125) | (0.138) | |
| DL Leg. Origin | 0.344 | 0.211 | |
|  | (0.124) | (0.182) | |
| L. World GDP | -0.004 | -0.024** | |
|  | (0.005) | (0.013) | |
| TFI Diffusion |  | 0.372*** | |
|  |  | (0.083) | |
| Countries | 93 | 67 | |
| Adj. R2 | 0.745 | 0.382 | |
| Num. obs. | 971 | 638 | |
| ***p < 0.001, **p < 0.01, *p < 0.05 |  |  | |  | |  |  |  |
|  |  |  | |  | |  |  |  |
|  |  |  | |  |  | |  |  |

### Binary PR Indicator

Table A7 – REWB Regressions with a Binary PR Indicator

|  | **A16** | **A17** | **A18** | **A19** | **A20** | **A21** |
| --- | --- | --- | --- | --- | --- | --- |
|  | **Mixed Systems Omitted** | | **Mixed Included as PR** | | **Separate Mixed Indicator** | |
|  | **AT** | **TFI** | **AT** | **TFI** | **AT** | **TFI** |
| PR | -0.09 | 3.04 | -0.196 | 0.308 | -0.194 | 0.329* |
|  | (0.09) | (1.63) | (0.103) | (0.161) | (0.108) | (0.158) |
| Mixed |  |  |  |  | 0.044 | 0.234 |
|  |  |  |  |  | (0.092) | (0.197) |
| L.GDP pc Within | -0.94*** | 16.53*** | -1.040*** | 1.298*** | -1.038*** | 1.313*** |
|  | (0.06) | (1.55) | (0.137) | (0.211) | (0.137) | (0.214) |
| L.GDP pc Between | -0.26*** | 3.83*** | -0.251*** | 0.300*** | -0.251*** | 0.308*** |
|  | (0.04) | (0.87) | (0.050) | (0.072) | (0.050) | (0.072) |
| L.Land Area | -0.03 | -0.01 | -0.019 | -0.007 | -0.021 | -0.014 |
|  | (0.02) | (0.45) | (0.030) | (0.053) | (0.030) | (0.053) |
| L.Pop.Den Within | -0.55** | 7.36 | -0.328 | 1.158 | -0.347 | 1.108 |
|  | (0.19) | (4.69) | (0.310) | (0.585) | (0.312) | (0.576) |
| L.Pop.Den Between | 0.03 | -1.60* | 0.028 | -0.124 | 0.027 | -0.123 |
|  | (0.04) | (0.71) | (0.043) | (0.069) | (0.043) | (0.068) |
| Unemployment Within | -0.01 | -0.10 | -0.017* | 0.004 | -0.017* | 0.003 |
|  | (0.01) | (0.15) | (0.008) | (0.020) | (0.008) | (0.020) |
| Unemployment Between | 0.00 | -0.10 | 0.003 | 0.001 | 0.002 | -0.002 |
|  | (0.01) | (0.15) | (0.007) | (0.008) | (0.007) | (0.008) |
| UK Legal Origin | 0.44* | -0.04 | 0.391* | -0.133 | 0.389* | -0.105 |
|  | (0.22) | (4.84) | (0.152) | (0.229) | (0.152) | (0.225) |
| FR Leg. Origin | 0.31 | 0.40 | 0.336* | 0.028 | 0.329* | 0.011 |
|  | (0.22) | (4.92) | (0.129) | (0.278) | (0.130) | (0.274) |
| Socialist Leg. Origin | -0.18 | 3.60 | -0.161 | 0.083 | -0.168 | 0.073 |
|  | (0.22) | (4.91) | (0.131) | (0.261) | (0.130) | (0.263) |
| DL Leg. Origin | -0.10 | 7.45 | 0.099 | 0.487 | 0.078 | 0.341 |
|  | (0.29) | (6.84) | (0.206) | (0.339) | (0.202) | (0.361) |
| L. World GDP | -0.01 | -0.46** | -0.003 | -0.034** | -0.004 | -0.035** |
|  | (0.01) | (0.16) | (0.005) | (0.011) | (0.005) | (0.011) |
| AVTariff Diffusion | 0.00 |  | -0.003 |  | -0.003 |  |
|  | (0.01) |  | (0.007) |  | (0.007) |  |
| TFI Diffusion |  | 2.07 |  | 0.189 |  | 0.191 |
|  |  | (1.11) |  | (0.135) |  | (0.133) |
| Adj. R2 | 0.54 | 0.54 | 0.524 | 0.398 | 0.524 | 0.398 |
| Countries | 82 | 55 | 93 | 67 | 93 | 67 |
| Num. obs. | 788 | 504 | 971 | 638 | 971 | 638 |
| ***p < 0.001, **p < 0.01, *p < 0.05 | | |  |  |  |  |
|  | | |  |  |  |  |
